# Supplementary material
Source: Springer Nature journal article supplement (https://www.springermedizin.de/resource/supplementary/12933_2007_90_MOESM1_ESM.pdf/9539568)

## A - Age at Referral

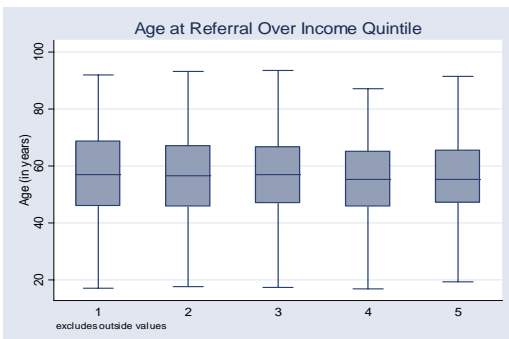

## B - BMI

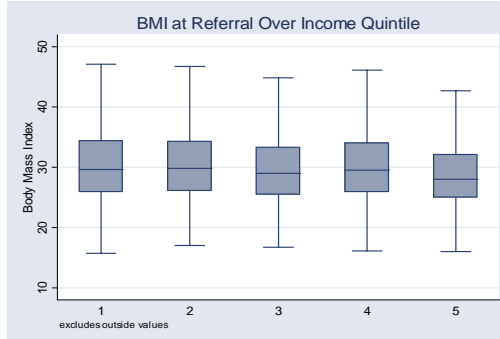

## C - Duration of Diabetes

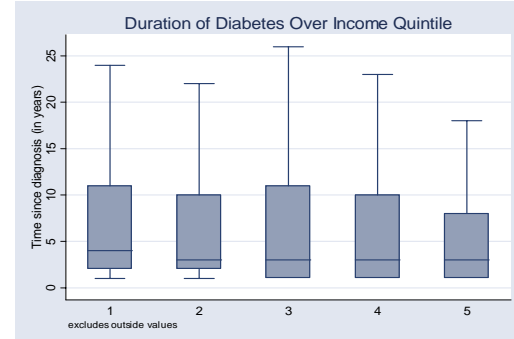

## D - Hemoglobin A1C

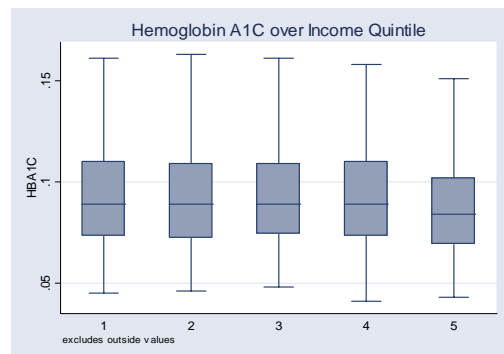

## E - LDL Cholesterol

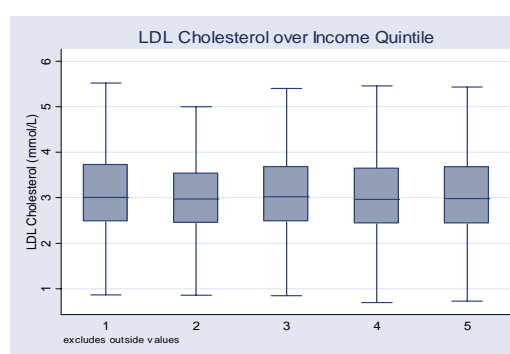

## F - HDL Cholesterol

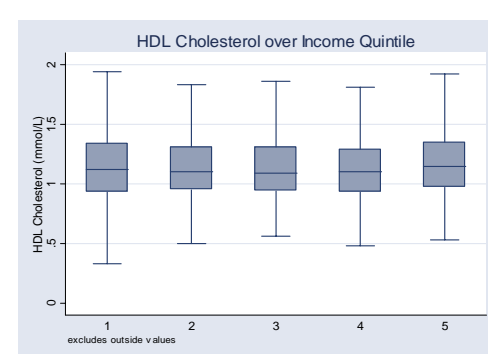

## G - Triglycerides

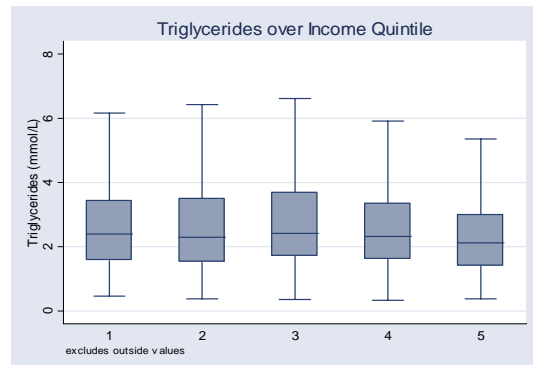

## H - Microalbumin: Creatinine Ratio

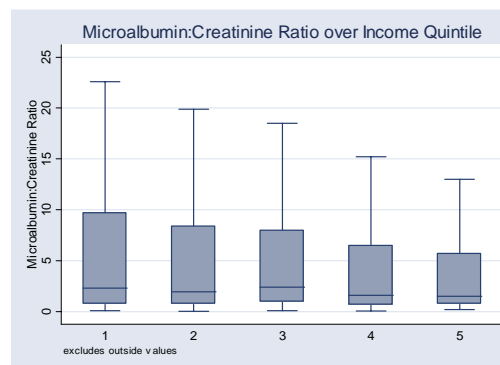

Supplement: MOESM1 [file 9539568]
